# Supplementary material for: Intermolecular and very strong intramolecular C–Se⋯O/N chalcogen bonds in nitrophenyl selenocyanate crystals
Source: Royal Society of Chemistry journal article supplement (doi:10.1039/c7cp08215k), 2018-01-01
Supplement: c7cp08215k1.pdf [file c7cp08215k1.pdf]

## Intermolecular and Very Strong Intramolecular C–Se $\cdots$ O/N Chalcogen Bonds in Nitrophenyl Selenocyanate Crystals

Hui Wang,<sup>\*a</sup> Ju Liu<sup>a</sup> and Weizhou Wang<sup>\*b</sup>

<sup>a</sup> Key Laboratory of Magnetic Molecules & Magnetic Information Materials, Ministry of Education, College of Chemistry & Material Science, Shanxi Normal University, Linfen, 041004, People's Republic of China E-mail: wanghui@sxnu.edu.cn

<sup>b</sup> College of Chemistry and Chemical Engineering, and Henan Key Laboratory of Function-Oriented Porous Materials, Luoyang Normal University, Luoyang 471934, People's Republic of China E-mail: wzw@lynu.edu.cn

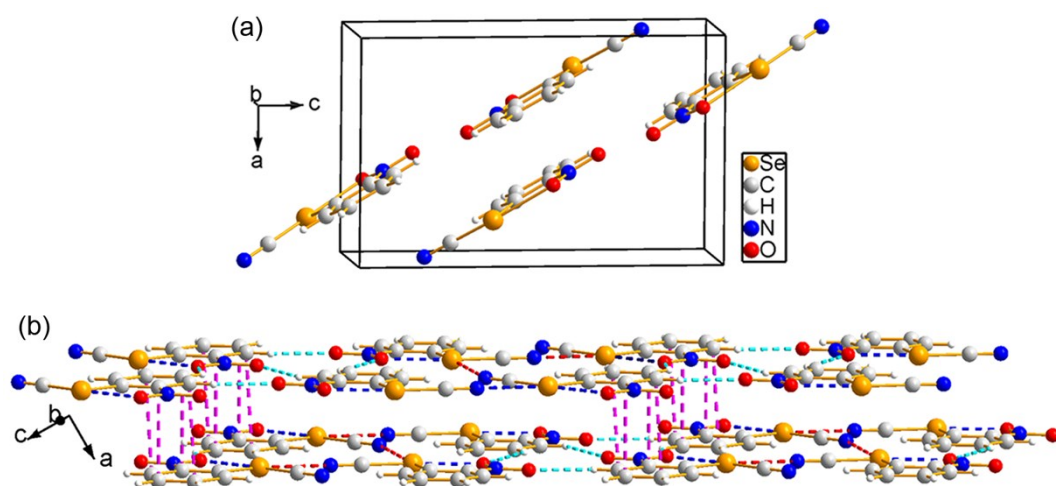

**Fig. S1** (a) The crystal cell unit of crystal **1a**, (b) The 3D supramolecular structure of crystal **1a** constructed by C–Se $\cdots$ N, C–Se $\cdots$ O chalcogen bonds, C–H $\cdots$ O hydrogen bond as well as  $\pi$ -hole $\cdots$  $\pi$ -hole bonds.

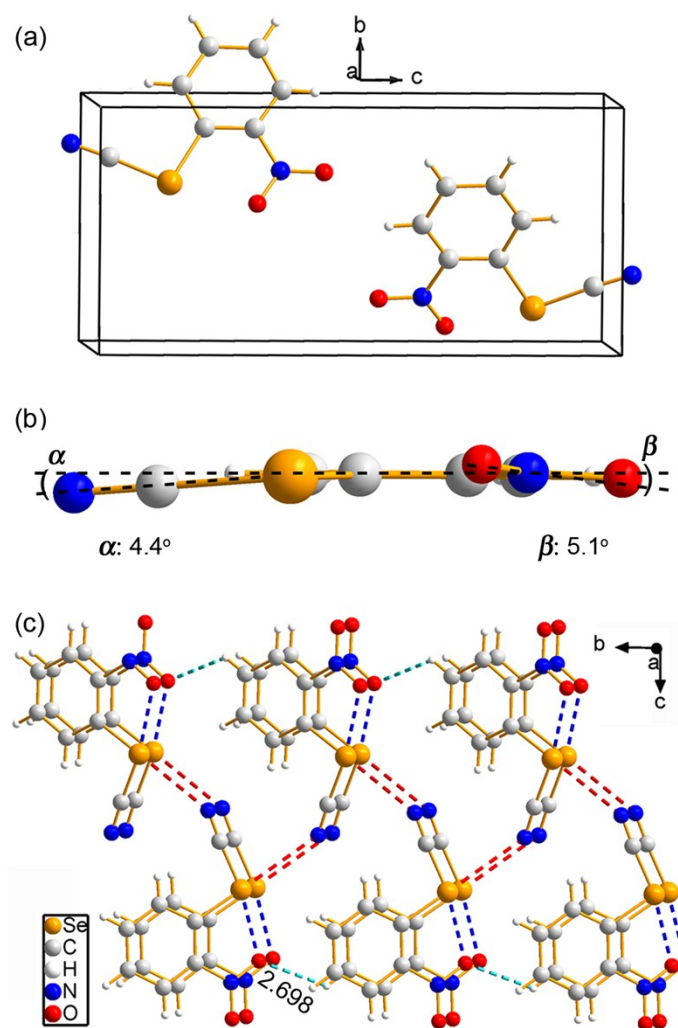

**Fig. S2** (a) The crystal cell unit of crystal **1b**, (b) The torsion angle between  $-\text{CN}/\text{plane}$  of  $-\text{NO}_2$  and the plane of phenyl ring, (c) The 3D supramolecular structure of crystal **1b** constructed by  $\text{C}-\text{Se}\cdots\text{N}$ ,  $\text{C}-\text{Se}\cdots\text{O}$  chalcogen bonds,  $\text{C}-\text{H}\cdots\text{O}$  hydrogen bond as well as  $\pi$ -hole $\cdots\pi$ -hole bonds (distance in Å).

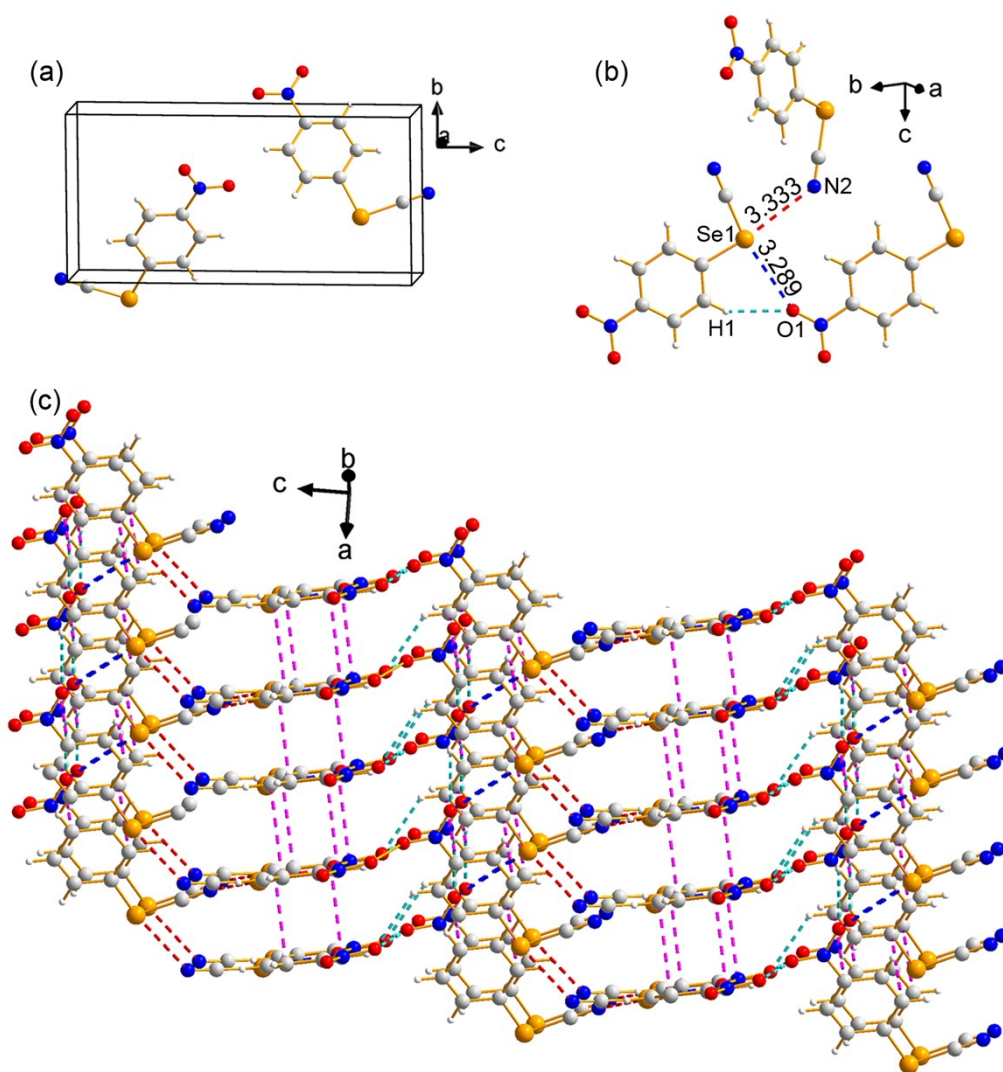

**Fig. S3** (a) The crystal cell unit of crystal **2**, (b) The bifurcated chalcogen bonds formed by Se atom of one *p*-NSC molecule with the N and O atoms from other adjacent two molecules (distance in Å), (c) The 3D supramolecular structure of crystal **2** constructed by C–Se $\cdots$ N, C–Se $\cdots$ O chalcogen bonds, C–H $\cdots$ O hydrogen bond as well as  $\pi$ -hole $\cdots$  $\pi$ -hole bonds.

**Table S1.** The main bonding properties and geometrical parameters of crystals.

| Crystals                                       | Interactions                                      | $d/(\text{Å})$                         |          | $\theta^\circ$ |
|------------------------------------------------|---------------------------------------------------|----------------------------------------|----------|----------------|
| <b>1a</b>                                      | C7–Se1 $\cdots$ O2 (x, y, z)                      | 2.5145(18)                             | –26.5%   | 169.83(8)      |
|                                                | C6–Se1 $\cdots$ N2 (–x, y–0.5, 0.5–z)             | 3.259(2)                               | –5.5%    | 175.50(7)      |
|                                                | $\pi_h\cdots\pi_h$ (C1 $\cdots$ C3, 1–x, 1–y, –z) | 3.447(3)                               | –6.8%    |                |
|                                                | $\pi_h\cdots\pi_h$ (C2 $\cdots$ C4, 1–x, 1–y, –z) | 3.538(3)                               | –4.4%    |                |
|                                                | C2–H2 $\cdots$ O1 (–x+1, y+0.5, –z–0.5)           | 2.541(3)                               | –6.5%    | 135.4          |
|                                                | C3–H3 $\cdots$ O2 (x, y+1, z)                     | 2.671(3)                               | –1.8%    | 126.9          |
| <b>1b</b>                                      | C7–Se1 $\cdots$ O1 (x, y, z)                      | 2.525(3)                               | –25.5%   | 170.06(12)     |
|                                                | C1–Se1 $\cdots$ N2 (–x–1, y–0.5, –z–2)            | 3.222(4)                               | –6.6%    | 178.90(10)     |
|                                                | $\pi_h\cdots\pi_h$ (C1 $\cdots$ C2, 1–x, 1–y, –z) | 3.588(4)                               | –3.0%    |                |
|                                                | $\pi_h\cdots\pi_h$ (C4 $\cdots$ C5, 1–x, 1–y, –z) | 3.594(5)                               | –2.9%    |                |
|                                                | C4–H4 $\cdots$ O2 (x+1, y+1, z)                   | 2.698(5)                               | –0.8%    | 126.3          |
|                                                | <b>2</b>                                          | C6–Se1 $\cdots$ N2 (–x–1, y–0.5, –z–2) | 3.333(5) | –3.4%          |
| C7–Se1 $\cdots$ O1 (x+1, y–1, z)               |                                                   | 3.289(4)                               | –3.8%    | 166.79(14)     |
| $\pi_h\cdots\pi_h$ (C2 $\cdots$ C3, x+1, y, z) |                                                   | 3.550(5)                               | –4.0%    |                |
| $\pi_h\cdots\pi_h$ (C5 $\cdots$ C6, x–1, y, z) |                                                   | 3.556(5)                               | –3.9%    |                |
| C1–H1 $\cdots$ O1 (x+1, y–1, z)                |                                                   | 2.564(5)                               | –5.7%    | 152.4          |
| C2–H2 $\cdots$ O2 (–x–1, y–0.5, –z–1)          |                                                   | 2.575(5)                               | –5.3%    | 128.6          |

The percentages represent the shortening degree of bonding length comparing to the sum of vdW radii of interacting atoms.

**Table S2.** The chalcogen bond interactions, second-order perturbation stabilization energies  $E^2$  (in  $\text{kJ}\cdot\text{mol}^{-1}$ ) and the amount of charge transfer  $\Delta q$  (in *a.u.*) of the selected units in crystal by NBO analysis.

| Crystals  | Bonds           | Donor          | Acceptor       | $E^2$ | $E^2_{\text{total}}$ | $\Delta q$ |
|-----------|-----------------|----------------|----------------|-------|----------------------|------------|
| <b>1a</b> | C–Se $\cdots$ N | LP(1)N7        | BD*(1)Se16–C17 | 6.28  | 6.28                 | 0.0045     |
|           | C–Se $\cdots$ O | LP(1)O4        | BD*(1)Se1–C3   | 15.31 | 62.34                |            |
|           |                 | LP(2)O4        | BD*(1)Se1–C3   | 47.03 |                      |            |
|           |                 | LP(1)O19       | BD*(1)Se16–C18 | 14.48 | 50.59                |            |
|           |                 | LP(2)O19       | BD*(1)Se16–C18 | 36.11 |                      |            |
| <b>1b</b> | C–Se $\cdots$ N | LP(1)N16       | BD*(1)Se17–C21 | 5.65  | 6.53                 | 0.0041     |
|           |                 | BD(2)C15–N16   | BD*(1)Se17–C21 | 0.88  |                      |            |
|           | C–Se $\cdots$ O | LP(1)O2        | BD*(1)Se3–C15  | 14.81 | 58.87                |            |
|           |                 | LP(2)O2        | BD*(1)Se3–C15  | 44.06 |                      |            |
|           |                 | LP(1)O18       | BD*(1)Se17–C19 | 16.02 | 60.45                |            |
|           | LP(2)O18        | BD*(1)Se17–C19 | 44.43          |       |                      |            |
| <b>2</b>  | C–Se $\cdots$ N | LP(1)N17       | BD*(1)Se1–C2   | 3.05  | 3.05                 | 0.0031     |
|           | C–Se $\cdots$ O | LP(1)O17       | BD*(1)Se1–C3   | 2.43  | 3.39                 | 0.0018     |
|           |                 | LP(2)O17       | BD*(1)Se1–C3   | 0.96  |                      |            |

“LP” for 1-center valence lone pair, “BD” for 2-center bonding and “BD\*” for 2-center antibonding.
